# Supplementary material for: Effectiveness of nivolumab affected by prior cetuximab use and neck dissection in Japanese patients with recurrent or metastatic head and neck cancer: results from a retrospective observational study in a real-world setting
Source: PubMed Central journal article supplement (PMC8134300; doi:10.1007/s10147-021-01900-4), 2021-04-08
Supplement: 10147_2021_1900_MOESM1_ESM.pdf [file 10147_2021_1900_MOESM1_ESM.pdf]

**Supplementary Material**

**Online Resource 1a** Overall survival in patients by treatment line for nivolumab

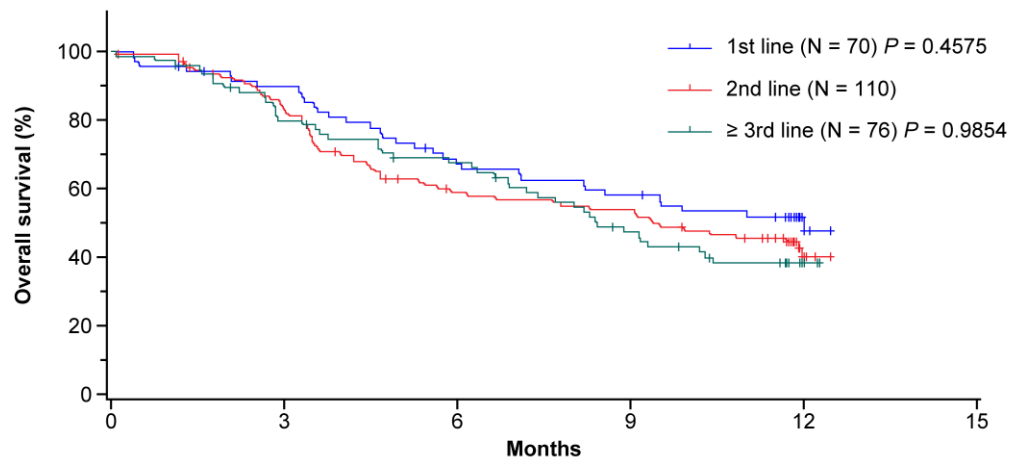

Number at risk

|            | 0   | 3  | 6  | 9  | 12 | 15 |
|------------|-----|----|----|----|----|----|
| 1st line   | 70  | 60 | 44 | 38 | 13 | 0  |
| 2nd line   | 110 | 87 | 58 | 53 | 12 | 0  |
| ≥ 3rd line | 76  | 59 | 48 | 32 | 11 | 0  |

| Prior lines of therapy | N   | Median OS (95% CI), months | 6-month OS rate (%) (95% CI) | 12-month OS rate (%) (95% CI) |
|------------------------|-----|----------------------------|------------------------------|-------------------------------|
| 1st line               | 70  | 12.0 (7.1, NE)             | 67.2 (54.6, 77.1)            | 51.8 (39.1, 63.0)             |
| 2nd line               | 110 | 9.4 (5.7, NE)              | 58.9 (48.8, 67.6)            | 40.2 (29.8, 50.4)             |
| ≥ 3rd line             | 76  | 8.4 (6.9, 10.4)            | 67.5 (55.5, 76.9)            | 38.3 (27.0, 49.5)             |

CI confidence interval, NE not evaluable, OS overall survival

**Online Resource 1b** Progression-free survival in patients by treatment line for nivolumab

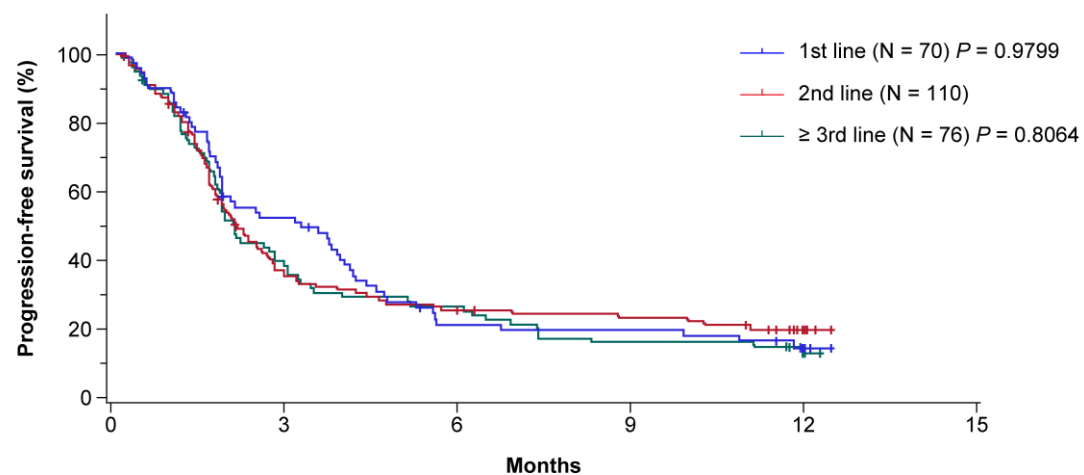

| Number at risk |     | Months |    |    |    |    |    |
|----------------|-----|--------|----|----|----|----|----|
|                |     | 0      | 3  | 6  | 9  | 12 | 15 |
| 1st line       | 70  | 70     | 34 | 12 | 11 | 4  | 0  |
| 2nd line       | 110 | 110    | 34 | 23 | 20 | 9  | 0  |
| ≥ 3rd line     | 76  | 76     | 26 | 19 | 11 | 4  | 0  |

| Prior lines of therapy | N   | Median PFS (95% CI), months | 6-month PFS rate (%) (95% CI) | 12-month PFS rate (%) (95% CI) |
|------------------------|-----|-----------------------------|-------------------------------|--------------------------------|
| 1st line               | 70  | 3.2 (1.8, 4.0)              | 20.1 (11.3, 30.6)             | 13.2 (6.2, 22.9)               |
| 2nd line               | 110 | 2.1 (1.7, 2.6)              | 24.2 (16.3, 32.8)             | 18.6 (11.6, 26.9)              |
| ≥ 3rd line             | 76  | 2.0 (1.7, 2.8)              | 25.4 (16.2, 35.6)             | 11.4 (5.4, 20.1)               |

CI confidence interval, PD progressive disease, PFS progression-free survival

**Online Resource 1c** Best objective response in patients by treatment line for nivolumab

| Statistics               |            | All          | Nivolumab treatment line |              |              |              |
|--------------------------|------------|--------------|--------------------------|--------------|--------------|--------------|
| Category                 |            |              | 1st line                 | 2nd line     | ≥ 3rd line   |              |
| Number of patients       |            | 256 (100.0%) | 70 (27.3%)               | 110 (43.0%)  | 76 (29.7%)   |              |
| The BOR assessed patient |            | 223 (87.1%)  | 61 (23.8%)               | 98 (38.3%)   | 64 (25.0%)   |              |
| BOR *1                   | CR         | 3 (1.3%)     | 0 (0.0%)                 | 2 (2.0%)     | 1 (1.6%)     |              |
|                          | PR         | 32 (14.3%)   | 9 (14.8%)                | 12 (12.2%)   | 11 (17.2%)   |              |
|                          | SD         | 61 (27.4%)   | 21 (34.4%)               | 23 (23.5%)   | 17 (26.6%)   |              |
|                          | PD         | 127 (57.0%)  | 31 (50.8%)               | 61 (62.2%)   | 35 (54.7%)   |              |
|                          | ORR (%) *1 | N (%)        | 35 (15.7%)               | 9 (14.8%)    | 14 (14.3%)   | 12 (18.8%)   |
|                          |            | 95% CI       | (11.2 ,21.1)             | (7.0 ,26.2)  | (8.0 ,22.8)  | (10.1 ,30.5) |
| DCR (%) *1               | N (%)      | 96 (43.0%)   | 30 (49.2%)               | 37 (37.8%)   | 29 (45.3%)   |              |
|                          | 95% CI     | (36.5 ,49.8) | (36.1 ,62.3)             | (28.2 ,48.1) | (32.8 ,58.3) |              |

\*1 RECIST ver.1.1

*BOR* best overall response, *CI* confidence interval, *CR* complete response, *DCR* disease control rate, *ORR* objective response rate, *PD* progressive disease, *PR* partial response, *RECIST* Response Evaluation Criteria in Solid Tumors, *SD* stable disease
